# Supplementary material
Source: publisher figshare collection journal article supplement (https://frontiersin.figshare.com/ndownloader/files/30920500)
Supplement: Supplementary file 1 [file 30920500]

Supplementary Table 2: Seed quality from the different seed systems

|  | **Seed quality parameters** | **Private sector mediated model** | **Community based model** | **Informal model** | **References** |
| --- | --- | --- | --- | --- | --- |
| Amaranth | Purity (%) | 99-100 in Kenya | - | - | (Kimenye, 2014) |
| Germination (%) | 79-88 in Kenya | 92.3-99.0 in Tanzania | 38 in Kenya | (Kimenye, 2014, Pincus et al., 2018) |
| African eggplant | Purity (%) | - | 92.3-99.0 in Tanzania | - | (Kimenye, 2014) |
| Germination (% | - | 92.3-99.0 in Tanzania | - | (Kimenye, 2014) |
| African  nightshade (*Solanum scabrum and S. villosum Miller)* | Purity (%) | 94 in Kenya  99-100 in Kenya | 99-100 in Tanzania | 74 - 68 in Kenya | (Kimaru et al., 2019, Kimenye, 2014) |
| Germination (% | 79-88 in Kenya | 92.3-99.0 in Tanzania | 57 -72 in Kenya | (Kimaru et al., 2019, Kimenye, 2014, Pincus et al., 2018) |
| Jute mallow | Purity (%) | 99-100 in Kenya | - | - | (Kimenye, 2014) |
| Germination (% | 79-88 in Kenya | - | 37 in Kenya | (Kimenye, 2014, Pincus et al., 2018) |
| African Kale/Ethiopia mustard | Purity (%) | - | - | - |  |
| Germination (% | - | - | 59 in Kenya | (Pincus et al., 2018) |
| Slender leaf | Purity (%) | - | - |  |  |
| Germination (%) | - | - | 74 in Kenya | (Pincus et al., 2018) |
| Spider plant | Purity (%) | - | - |  |  |
| Germination (%) | - | - | 33 in Kenya | (Pincus et al., 2018) |
| *Crotalaria* | Purity (%) | 99-100 in Kenya | - | - | (Kimenye, 2014) |
| Germination (%) | 79-88 in Kenya | - | - | (Kimenye, 2014) |
